# Supplementary material for: Pregnancy-related cardiovascular conditions and outcomes in a United States Medicaid population
Source: HighWire-hosted journal article supplement (doi:10.1136/heartjnl-2021-320684), 2022-04-13
Supplement: heartjnl-2021-320684supp001_data_supplement.pdf [file heartjnl-2021-320684supp001_data_supplement.pdf]

## Appendix 1: Diagnosis codes used to identify selected clinical conditions

| Condition                                                                                                                                                                                                                                                | ICD-10-CM Codes                                                                                                                                              |
|----------------------------------------------------------------------------------------------------------------------------------------------------------------------------------------------------------------------------------------------------------|--------------------------------------------------------------------------------------------------------------------------------------------------------------|
| <b>Inclusion criteria</b>                                                                                                                                                                                                                                |                                                                                                                                                              |
| <b>Delivery</b>                                                                                                                                                                                                                                          |                                                                                                                                                              |
| Encounter for full-term uncomplicated delivery                                                                                                                                                                                                           | O80                                                                                                                                                          |
| Encounter for caesarean delivery without indication                                                                                                                                                                                                      | O82                                                                                                                                                          |
| <b>Exposure measures</b>                                                                                                                                                                                                                                 |                                                                                                                                                              |
| <b>Pregnancy-related cardiometabolic morbidities</b>                                                                                                                                                                                                     |                                                                                                                                                              |
| <b>- Hypertensive disorder of pregnancy (HDP)</b>                                                                                                                                                                                                        |                                                                                                                                                              |
| Pre-existing hypertension complicating pregnancy, childbirth and the puerperium. <ul style="list-style-type: none"> <li>Incl.: the listed conditions with pre-existing proteinuria</li> <li>Excl.: that with superimposed pre-eclampsia (O11)</li> </ul> | O100, O101, O102, O103, O104, O109                                                                                                                           |
| Gestational hypertension                                                                                                                                                                                                                                 | O13                                                                                                                                                          |
| Mild to moderate pre-eclampsia                                                                                                                                                                                                                           |                                                                                                                                                              |
| *Mild to moderate pre-eclampsia                                                                                                                                                                                                                          | O140                                                                                                                                                         |
| *Pre-eclampsia, unspecified                                                                                                                                                                                                                              | O149                                                                                                                                                         |
| *Superimposed pre-eclampsia                                                                                                                                                                                                                              | O11                                                                                                                                                          |
| Severe pre-eclampsia/eclampsia                                                                                                                                                                                                                           |                                                                                                                                                              |
| *Severe pre-eclampsia                                                                                                                                                                                                                                    | O141                                                                                                                                                         |
| *HELLP syndrome                                                                                                                                                                                                                                          | O142                                                                                                                                                         |
| *Eclampsia in pregnancy                                                                                                                                                                                                                                  | O150                                                                                                                                                         |
| *Eclampsia in labour                                                                                                                                                                                                                                     | O151                                                                                                                                                         |
| *Eclampsia in the puerperium                                                                                                                                                                                                                             | O152                                                                                                                                                         |
| *Eclampsia unspecified as to time period                                                                                                                                                                                                                 | O159                                                                                                                                                         |
| <b>- Diabetes mellitus in pregnancy (Gestational diabetes)</b>                                                                                                                                                                                           |                                                                                                                                                              |
| Diabetes mellitus arising in pregnancy,                                                                                                                                                                                                                  | O244                                                                                                                                                         |
| Diabetes mellitus in pregnancy, unspecified                                                                                                                                                                                                              | O249                                                                                                                                                         |
| <b>- Pre-existing diabetes mellitus in pregnancy</b>                                                                                                                                                                                                     |                                                                                                                                                              |
| Pre-existing type 1 diabetes mellitus                                                                                                                                                                                                                    | O240                                                                                                                                                         |
| Pre-existing type 2 diabetes mellitus                                                                                                                                                                                                                    | O241                                                                                                                                                         |
| Pre-existing diabetes mellitus, unspecified                                                                                                                                                                                                              | O243                                                                                                                                                         |
| Other pre-existing diabetes mellitus in pregnancy                                                                                                                                                                                                        | O248                                                                                                                                                         |
| <b>Outcome measures (delivery and postnatal)/Sensitivity (all periods)</b>                                                                                                                                                                               |                                                                                                                                                              |
| <b>Severe Cardiovascular outcomes</b>                                                                                                                                                                                                                    |                                                                                                                                                              |
| <b>- Myocardial infarction</b>                                                                                                                                                                                                                           | I2101, I2102, I2109, I2111, I2119, I2121, I2129, I213, I214, I219, I21A1, I21A9, I220, I221, I222, I228, I229                                                |
| <b>- Pulmonary embolism</b>                                                                                                                                                                                                                              | I260, I269                                                                                                                                                   |
| <b>- Heart Failure</b>                                                                                                                                                                                                                                   | I501, I5020, I5021, I5023, I5030, I5031, I5033, I5040, I5041, I5043, I5082, I5083, I5084, I5089, I509                                                        |
| <b>- Cardiac Arrest</b>                                                                                                                                                                                                                                  | I469,                                                                                                                                                        |
| <b>- VT and Re-entry ventricular arrhythmia,</b>                                                                                                                                                                                                         | I470,                                                                                                                                                        |
| <b>- Ventricular tachycardia</b>                                                                                                                                                                                                                         | I472,                                                                                                                                                        |
| <b>- VF</b>                                                                                                                                                                                                                                              | I4901, I4902                                                                                                                                                 |
| <b>- Cerebrovascular disease</b>                                                                                                                                                                                                                         | I600, I601, I602, I603, I604, I605, I606, I607, I608, I609, I610, I611, I612, I613, I614, I615, I616, I617, I618, I619, I620, I621, I629, I6781, I6782, I679 |
| <b>- Aortic dissection</b>                                                                                                                                                                                                                               | I7100, I7101, I7102, I7103, I711, I713,                                                                                                                      |
| <b>- Aortic aneurysm</b>                                                                                                                                                                                                                                 | I715, I718                                                                                                                                                   |

\*Recorded diagnosis of pre-eclampsia (ICD-10AM code: O11, O14), or eclampsia (O15)
